# Supplementary material
Source: PubMed Central journal article supplement (PMC8646549)
Supplement: PAI-33-0-s001.pdf [file PAI-33-0-s001.pdf]

**Supplementary Table S1 – Characteristics associated with hospitalization**

|                                | Hospitalized<br>(N=26) | Not hospitalized<br>(N=1,226) | P-value          |
|--------------------------------|------------------------|-------------------------------|------------------|
| Age, years                     | <b>7.4 [0.3-15.1]</b>  | <b>12.6 [6.0-17.1]</b>        | <b>0.004</b>     |
| Male sex                       | 10 (38.5%)             | 629 (51.3%)                   | 0.19             |
| Race:                          |                        |                               | <b>0.001</b>     |
| - White                        | <b>15 (57.7%)</b>      | <b>993 (81.0%)</b>            |                  |
| - Black                        | <b>10 (38.5%)</b>      | <b>139 (11.3%)</b>            |                  |
| - Other/unknown                | <b>1 (3.9%)</b>        | <b>94 (7.7%)</b>              |                  |
| Hispanic                       | 0 (0%)                 | 9 (0.7%)                      | 0.59             |
| BMI, percentile (n=960)        | 82.0 [33.0-98.5]       | 65.8 [32.8-88.8]              | 0.08             |
| Household income               |                        |                               |                  |
| - Zip code median <sup>1</sup> | <b>\$54.6 (\$15.3)</b> | <b>\$68.8 (\$23.0)</b>        | <b>0.003</b>     |
| - Below median <sup>2</sup>    | <b>19 (79.2%)</b>      | <b>575 (48.2%)</b>            | <b>0.003</b>     |
| Pre-existing asthma diagnosis  | <b>7 (26.9%)</b>       | <b>135 (11.0%)</b>            | <b>0.01</b>      |
| Recent travel                  | 1 (3.9%)               | 43 (3.5%)                     | 0.94             |
| Known exposure                 | <b>10 (38.5%)</b>      | <b>822 (67.1%)</b>            | <b>0.002</b>     |
| Interval, days:                |                        |                               |                  |
| - Symptoms to presentation     | <b>3 [1-4]</b>         | <b>2 [1-3]</b>                | <b>0.01</b>      |
| - Symptoms to test             | 3 [1-5]                | 2 [1-4]                       | 0.71             |
| Initial symptoms:              |                        |                               |                  |
| - Asymptomatic                 | 3 (11.5%)              | 137 (11.2%)                   | 0.95             |
| - Fever                        | <b>17 (65.4%)</b>      | <b>479 (39.1%)</b>            | <b>0.007</b>     |
| - Fatigue                      | <b>8 (30.8%)</b>       | <b>178 (14.5%)</b>            | <b>0.02</b>      |
| - Cough                        | 15 (57.7%)             | 524 (42.7%)                   | 0.13             |
| - Wheezing                     | <b>5 (19.2%)</b>       | <b>7 (0.6%)</b>               | <b>&lt;0.001</b> |
| - Dyspnea                      | <b>7 (26.9%)</b>       | <b>31 (2.5%)</b>              | <b>&lt;0.001</b> |
| - Chest pain                   | <b>3 (11.5%)</b>       | <b>20 (1.6%)</b>              | <b>&lt;0.001</b> |
| - Loss of smell                | 6 (23.1%)              | 142 (11.6%)                   | 0.07             |
| - Loss of taste                | 5 (19.2%)              | 150 (12.2%)                   | 0.28             |
| - Abdominal pain               | 2 (7.7%)               | 58 (4.7%)                     | 0.48             |
| - Vomiting                     | <b>7 (26.9%)</b>       | <b>35 (2.9%)</b>              | <b>&lt;0.001</b> |
| Initial treatment:             |                        |                               |                  |
| - Any pharmacologic treatment  | <b>10 (38.5%)</b>      | <b>15 (1.2%)</b>              | <b>&lt;0.001</b> |
| - Albuterol                    | <b>4 (15.4%)</b>       | <b>14 (1.1%)</b>              | <b>&lt;0.001</b> |
| - Systemic steroids            | <b>7 (26.9%)</b>       | <b>4 (0.33%)</b>              | <b>&lt;0.001</b> |

Numbers represent mean (SD) or median [interquartile range] for continuous variables, and n (%) for categorical variables. BMI: Body mass index. <sup>1</sup>Average of the median household incomes (in thousands of USD) for all participants' zip codes, based on US Census American Community Survey (ACS) 5-year data (2015-2019). <sup>2</sup>Number of participants who live in zip codes with median household income below the median for all zip codes in the study.

Supplementary Figure S1 – Distribution of hospitalizations over time during the study period

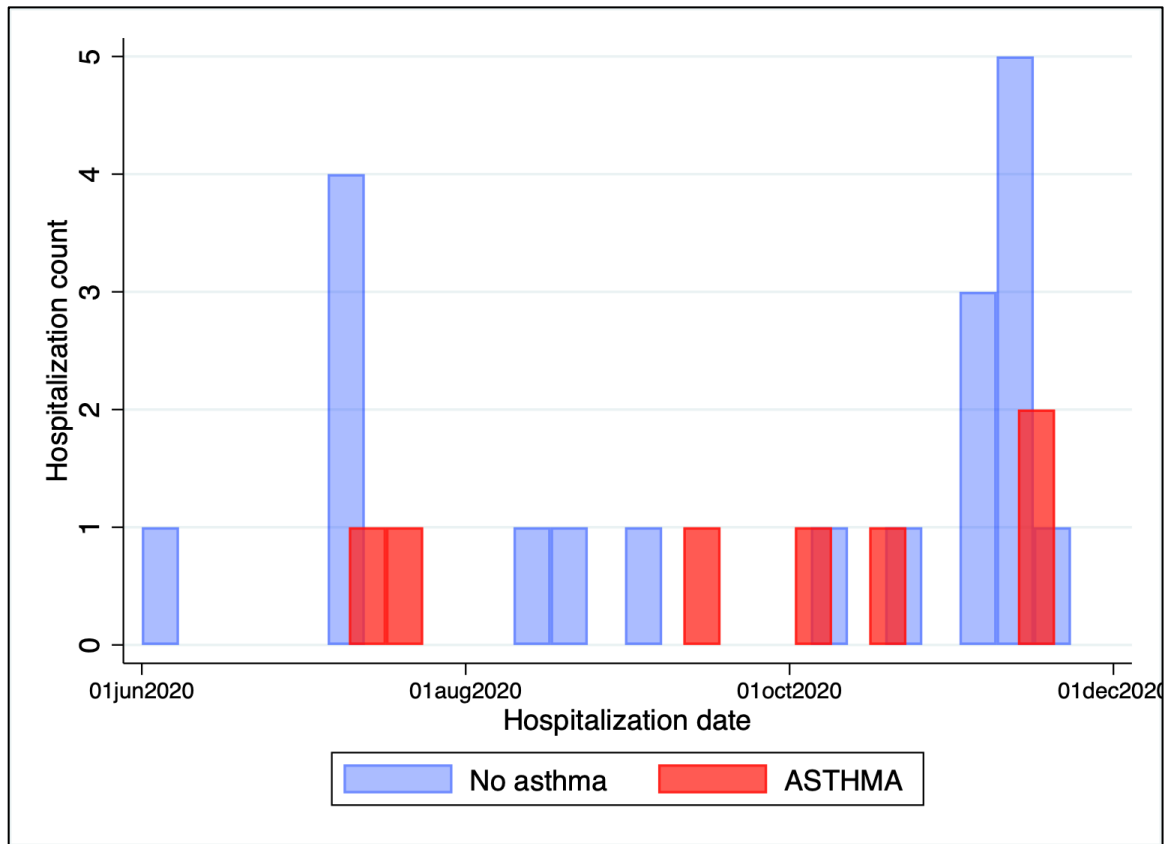

Supplementary Figure S2: Results from propensity score matching

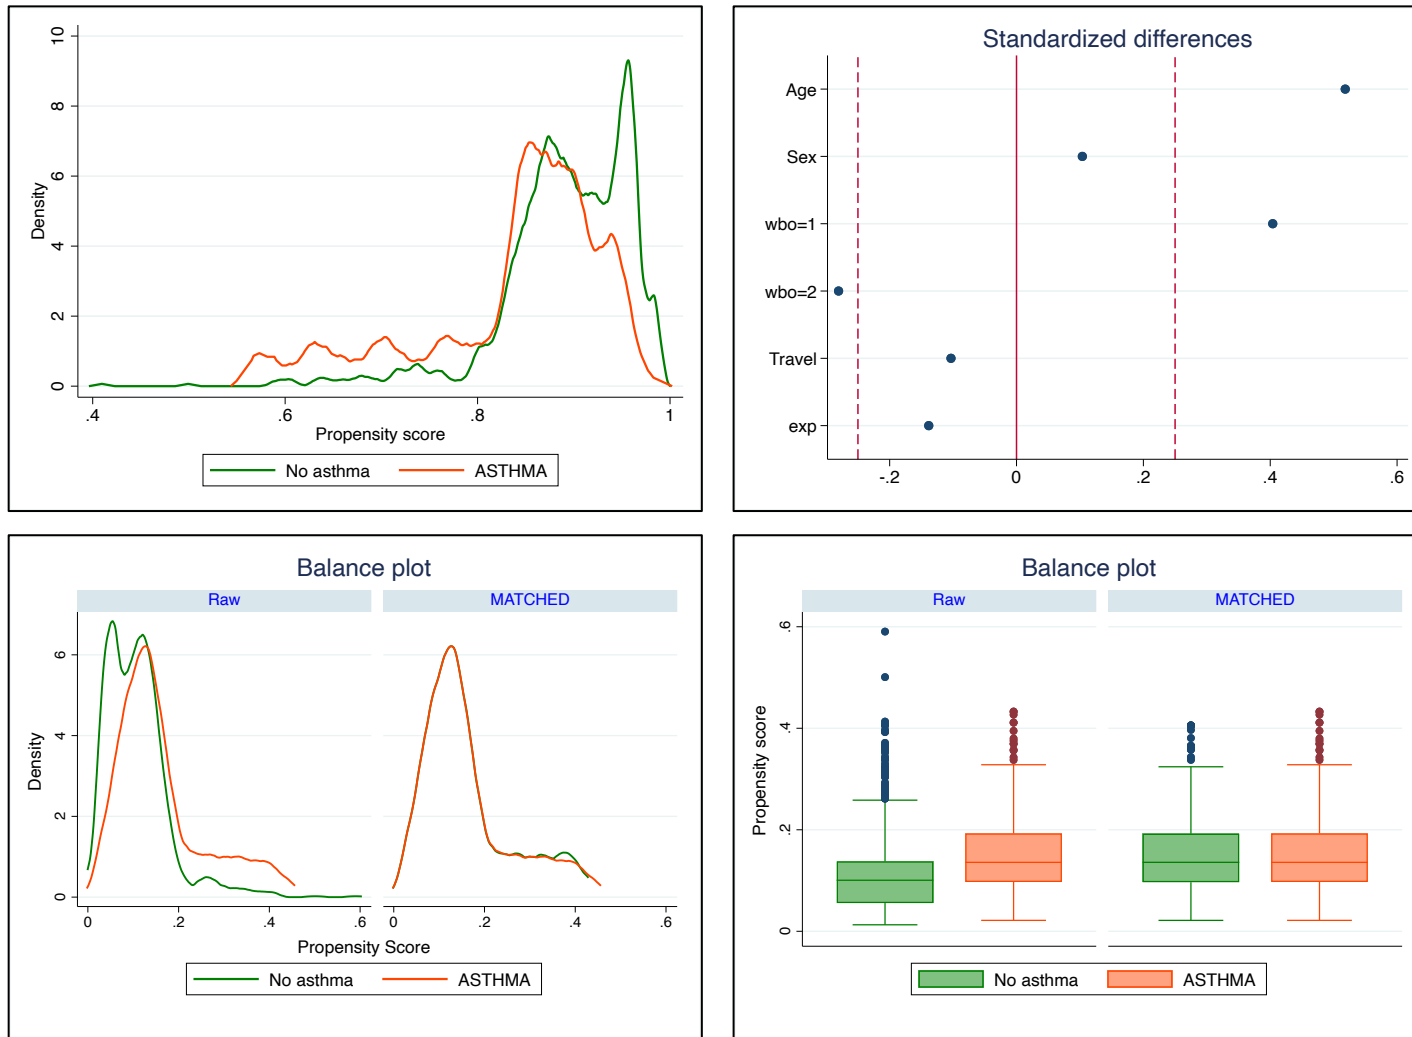

Top left shows distribution of propensity score by asthma status prior to propensity score matching (PSM). Top right shows particularly high standardized differences for age and race. Lower row shows density (left) and box plots (right) that demonstrate good overall balance after PSM.

**Supplementary Table S2 – Demographic characteristics of A+C Cases and C+ Controls after propensity score matching**

|                 | A+C Cases<br>(Asthma and COVID-19) | C+ Controls<br>(COVID-19 only) | P-value |
|-----------------|------------------------------------|--------------------------------|---------|
| N               | 142                                | 398                            |         |
| Age, years      | 14.6 [10.7-17.9]                   | 14.5 [9.6-17.8]                | 0.31    |
| Male sex        | 79 (55.6%)                         |                                |         |
| Race:           |                                    |                                | 0.23    |
| - White         | 103 (72.5%)                        | 314 (78.9%)                    |         |
| - Black         | 36 (25.4%)                         | 74 (18.6%)                     |         |
| - Other/unknown | 3 (2.1%)                           | 10 (2.5%)                      |         |
| Hispanic        | 1 (0.7%)                           | 1 (0.3%)                       | 0.47    |

*Propensity score matching (PSM) performed with a 1:4 case:control ratio with replacement, matching on age, sex, race, recent travel, and known exposure. Compared to Table 1 in the main manuscript, this shows adequate matching on the relevant covariates, but also a significant decrease in sample size (from N=1,252 to N=540, or 43.1% of original sample size).*

**Supplementary Table S3 – Association between asthma and hospitalization for COVID-19 using propensity score matching**

| Replacement  | No           |              | Yes                |                    |                   |
|--------------|--------------|--------------|--------------------|--------------------|-------------------|
|              | 1:1          | 1:2          | 1:3                | 1:4                | 1:5               |
| 1:N ratio    | 1:1          | 1:2          | 1:3                | 1:4                | 1:5               |
| Controls     | 142          | 223          | 316                | 398                | 463               |
| Total sample | 284          | 365          | 458                | 540                | 605               |
| Hospitalized | 8            | 10           | 12                 | 12                 | 14                |
| T-statistic  | 2.16         | 1.74         | 1.92               | 1.91               | 1.81              |
| Asthma:      |              |              |                    |                    |                   |
| - OR         | 7.31         | 3.80         | <b>4.04</b>        | <b>4.08</b>        | <b>3.38</b>       |
| - 95%CI      | (0.89-60.2)  | (0.98-14.9)  | <b>(1.16-14.0)</b> | <b>(1.27-13.1)</b> | <b>(1.16-9.8)</b> |
| - P-value    | <b>0.064</b> | <b>0.056</b> | <b>0.028</b>       | <b>0.018</b>       | <b>0.025</b>      |

*Table shows results from the analysis of asthma vs hospitalization risk, using PSM rather than adjusted regression analysis as shown in Table 3 in the main manuscript. Results with 1:1 and 1:2 matching approach but do not reach statistical significance, despite including only 22.7% and 29.2% of the original sample size. Results with 1:3 matching or higher (>36.6% of the original sample size) were all significant, with estimates similar to those in Table 3 Model 1 (OR=3.95, 95%CI=1.43-10.9).*

**Supplementary Table S4 – Asthma characteristics restricted to cases and controls seen in CHP asthma subspecialty clinics (Pulmonology and/or Allergy)**

|                                        | A+C cases           | A+ controls          | P-value      |
|----------------------------------------|---------------------|----------------------|--------------|
| Asthma severity:                       |                     |                      |              |
| - Intermittent                         | 8 (27.6%)           | 32 (23.5%)           |              |
| - Mild persistent                      | 13 (44.8%)          | 50 (36.8%)           |              |
| - Moderate persistent                  | 6 (20.6%)           | 41 (30.2%)           |              |
| - Severe persistent                    | 2 (6.9%)            | 13 (9.6%)            |              |
| Controller medication:                 |                     |                      |              |
| - ICS                                  | 16 (55.2%)          | 71 (52.2%)           | 0.77         |
| - ICS/LABA                             | 5 (17.2%)           | 22 (16.2%)           | 0.89         |
| Symptom control:                       |                     |                      |              |
| - C-ACT score                          | 23.7 (1.5)          | 21.6 (4.0)           | 0.38         |
| - ACT score                            | 20.9 (3.6)          | 20.2 (4.7)           | 0.60         |
| - Poorly controlled <sup>1</sup>       | 4 (23.5%)           | 27 (31.4%)           | 0.77         |
| Lung function:                         |                     |                      |              |
| - FEV1, %pred                          | 95.2 (13.3)         | 94.1 (17.7)          | 0.80         |
| - FVC, %pred                           | 98.7 (10.7)         | 92.2 (38.2)          | 0.46         |
| - FEV1/FVC                             | 84.3 (8.6)          | 72.3 (28.1)          | 0.08         |
| History of atopy:                      |                     |                      |              |
| - Eczema                               | 8 (27.6%)           | 61 (44.9%)           | 0.09         |
| - Allergic rhinitis                    | 18 (62.1%)          | 102 (75.0%)          | 0.16         |
| - Food allergies                       | 6 (20.7%)           | 40 (29.4%)           | 0.34         |
| - Any specific IgE+                    | 3 (10.3%)           | 7 (5.2%)             | 0.38         |
| - Any skin test+                       | 1 (3.5%)            | 6 (4.4%)             | 0.99         |
| - None                                 | <b>9 (31.0%)</b>    | <b>21 (15.4%)</b>    | <b>0.048</b> |
| Atopy biomarkers:                      |                     |                      |              |
| - Eosinophils, percent                 | <b>2 [1-3]</b>      | <b>4 [2-7]</b>       | <b>0.02</b>  |
| - Eosinophils, cells/ $\mu$ L          | <b>140 [50-240]</b> | <b>300 [190-580]</b> | <b>0.006</b> |
| - Total IgE, UI/mL                     | 501 [169-839]       | 195 [80-704]         | 0.59         |
| Subspecialist care:                    |                     |                      |              |
| - Pediatric Pulmonology                | 20 (68.9%)          | 84 (61.8%)           | 0.47         |
| - Allergy / Immunology                 | 11 (37.9%)          | 72 (52.9%)           | 0.14         |
| Severe exacerbations:                  |                     |                      |              |
| - Any events <sup>2</sup>              | 16 (55.2%)          | 71 (52.2%)           | 0.77         |
| - Events in the past year <sup>3</sup> | 1 [0.5-2.5]         | 1.5 [1-2.5]          | 0.31         |

Numbers represent mean (SD) or median [interquartile range] for continuous variables, and n (%) for categorical variables. ACT: Asthma control test (ages  $\geq 12$  years, range 5-25). C-ACT: Childhood asthma control test (ages 4-11 years, range 0-27). <sup>1</sup>Defined as C-ACT or ACT  $\leq 19$ . <sup>2</sup>Number of patients with  $\geq 1$  asthma-related ED visit, hospitalization, or systemic steroid course from January 2018 to December 2019. <sup>3</sup>Rate among those who had at least one event.
